# Supplementary material for: IL‐8 induces miR‐424‐5p expression and modulates SOCS2/STAT5 signaling pathway in oral squamous cell carcinoma
Source: PubMed Central journal article supplement — Mol Oncol. 2016 Mar 22;10(6):895–909. doi: 10.1016/j.molonc.2016.03.001 (PMC5423170; doi:10.1016/j.molonc.2016.03.001), 2016-03-22
Supplement: MOL2-10-895-s001.pdf [file MOL2-10-895-s001.pdf]

# Supplementary Figure 1

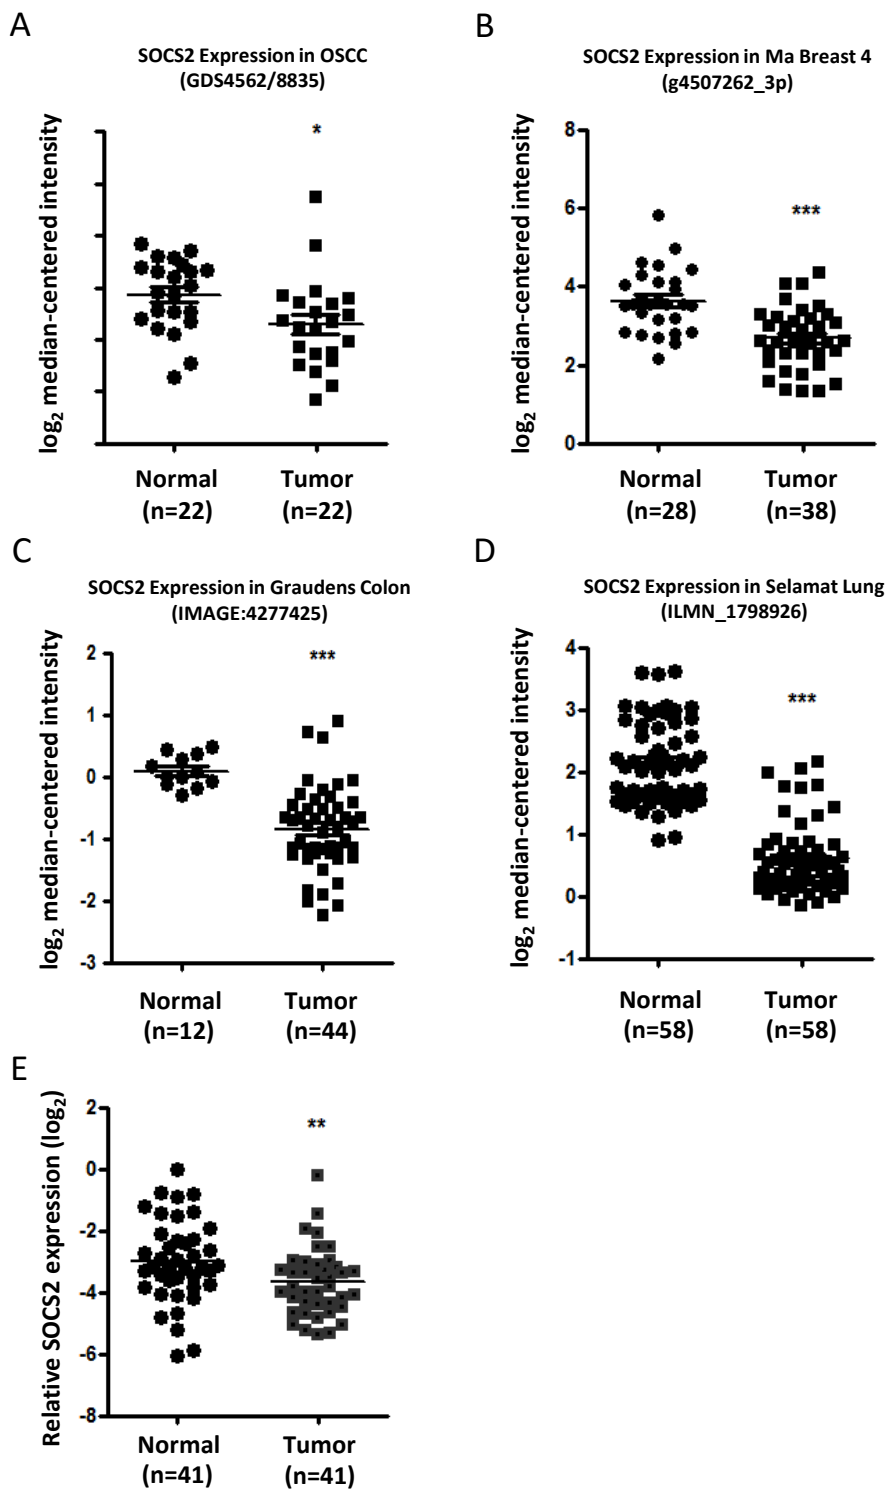

**Supplementary Figure 1 - SOCS2 expression level in public available microarray datasets.** Oncomin analysis (<https://www.oncomine.com/resource/login.html>) of SOCS2 expression. **A:** Relative SOCS2 mRNA level (GDS4562/8835) in 22 paired oral squamous cell carcinoma. **B:** Relative SOCS2 mRNA level (g4507262\_3p) in 38 invasive ductal breast carcinoma strom patient and 28 normal tissues. **C:** Relative SOCS2 mRNA level (IMAG(E)4277425) in 44 colorectal carcinoma patient and 12 normal tissues. **D:** Relative SOCS2 mRNA level (ILMN\_1798926) in 58 lung adenocarcinoma patient and 58 normal tissues. **E:** qRT-PCR analysis to validate the SOCS2 expression pattern in tumors versus their normal adjacent tissues for another OSCC cohort samples (n=41). \*,  $p < 0.05$ ; \*\*,  $p < 0.01$ ; \*\*\*,  $p < 0.001$ .
