# Supplementary material for: IL‐8 induces miR‐424‐5p expression and modulates SOCS2/STAT5 signaling pathway in oral squamous cell carcinoma
Source: PubMed Central journal article supplement — Mol Oncol. 2016 Mar 22;10(6):895–909. doi: 10.1016/j.molonc.2016.03.001 (PMC5423170; doi:10.1016/j.molonc.2016.03.001), 2016-03-22
Supplement: MOL2-10-895-s002.pdf [file MOL2-10-895-s002.pdf]

## Supplementary Figure 2

A

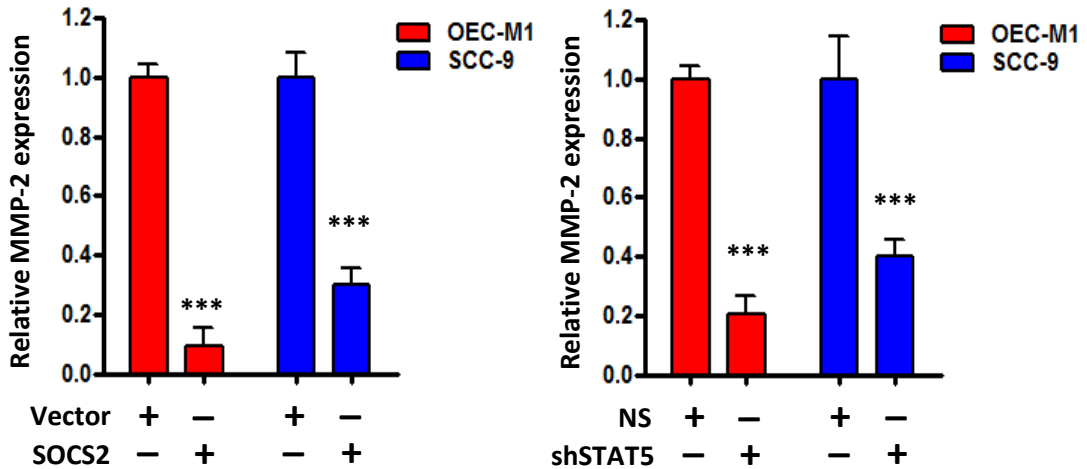

B

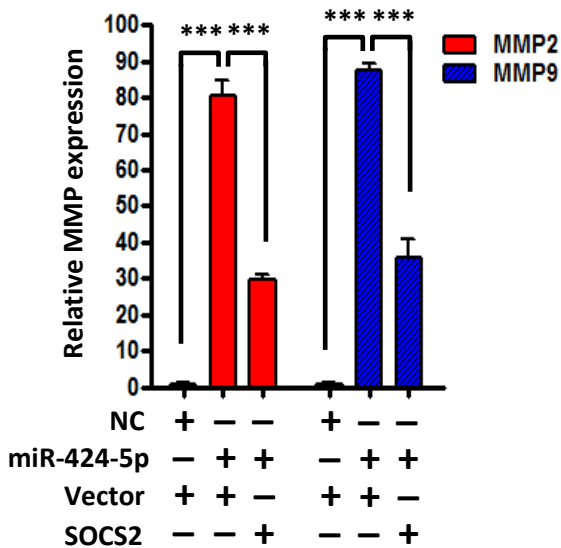

C

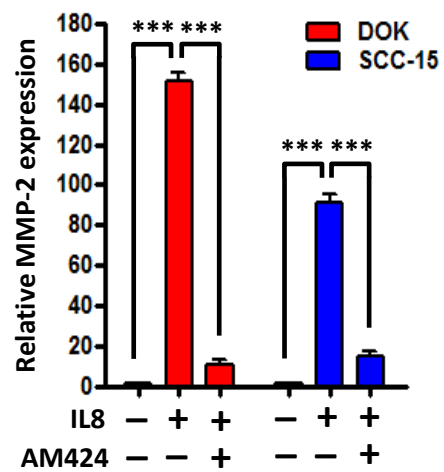

**Supplementary Figure 2 – The qRT-PCR analysis of MMP expression in OSCC cell lines.** **A:** qRT-PCR analysis of MMP-2 transcript after transfection of SOCS2 or shSTAT5 plasmids for 48 h in OEC-M1 and SCC-9 cells. **B:** SCC-15 cells were transfected with miR-424-5p mimics or scramble control (NC) for 24 h and then transfected with SOCS2 expression vector (without 3'-UTR) or control vector for another 24 hrs. **C:** DOK and SCC-15 cells were transfected with miR-424-5p specific inhibitors (AM424) for 24 h, followed by addition of IL-8 (10 ng/ml) for 48 h. All data are presented as mean  $\pm$  SE; \*\*\*,  $p < 0.001$ . GAPDH was used as an internal control.
