# Supplementary material for: IL‐8 induces miR‐424‐5p expression and modulates SOCS2/STAT5 signaling pathway in oral squamous cell carcinoma
Source: PubMed Central journal article supplement — Mol Oncol. 2016 Mar 22;10(6):895–909. doi: 10.1016/j.molonc.2016.03.001 (PMC5423170; doi:10.1016/j.molonc.2016.03.001), 2016-03-22
Supplement: MOL2-10-895-s003.pdf [file MOL2-10-895-s003.pdf]

### Supplementary Figure 3

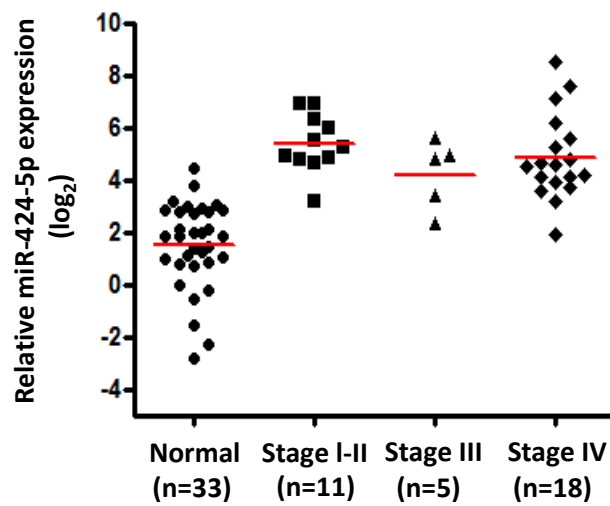

**Supplementary Figure 3 – The aberrant expression of miR-424-5p in OSCC.** qRT-PCR analysis to validate the miR-424-5p expression pattern in tumors with different tumor stage versus their normal adjacent tissues (n=33).
