# Supplementary material for: IL‐8 induces miR‐424‐5p expression and modulates SOCS2/STAT5 signaling pathway in oral squamous cell carcinoma
Source: PubMed Central journal article supplement — Mol Oncol. 2016 Mar 22;10(6):895–909. doi: 10.1016/j.molonc.2016.03.001 (PMC5423170; doi:10.1016/j.molonc.2016.03.001), 2016-03-22
Supplement: MOL2-10-895-s004.pdf [file MOL2-10-895-s004.pdf]

### Supplementary Figure 4

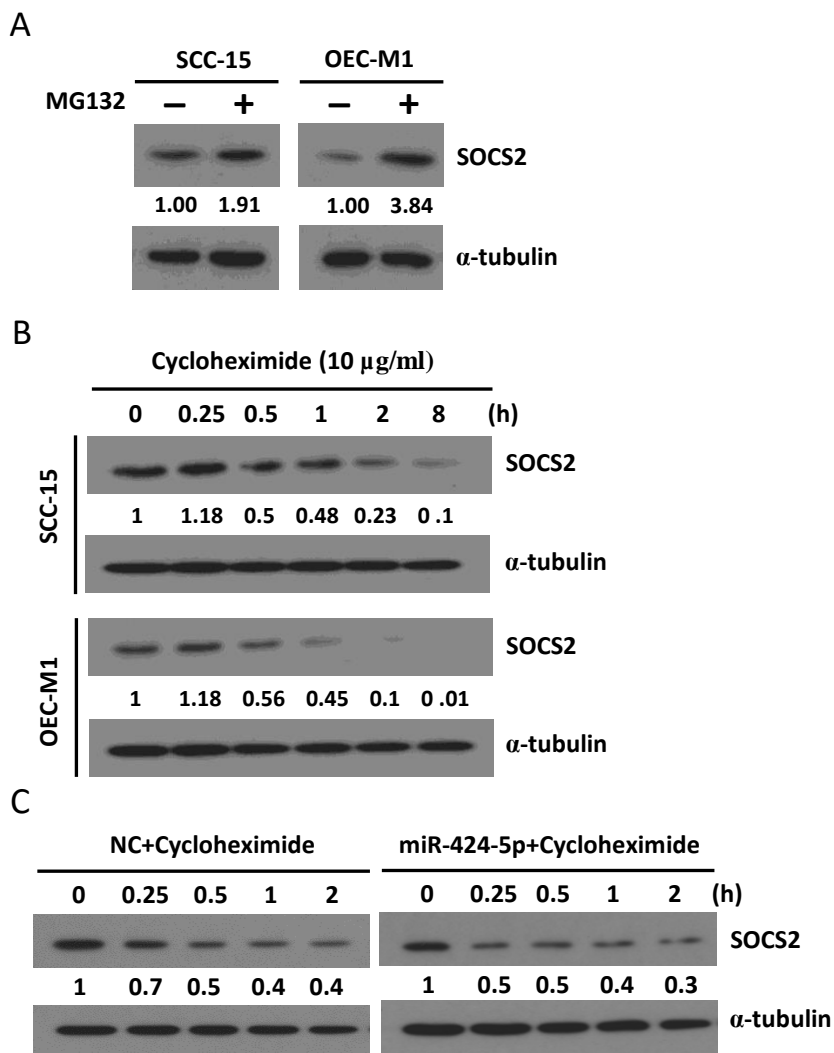

#### Supplementary Figure 4 – Effects of MG132 and cycloheximide on SOCS2 stability.

**A:** Western blot analysis of the SOCS2 protein levels in SCC-15 and OEC-M1 cells treated with or without 20  $\mu$ M of MG132 for 12 h. **B:** Western blot analysis of the SOCS2 protein levels in SCC-15 and OEC-M1 cells treated with or without 10  $\mu$ g/ml of cycloheximide for the indicated times. **C:** SCC-15 cells were transfected with miR-424-5p mimics (50 nM) or scramble control (NC) for 24 h. Cells were then treated with cycloheximide (10  $\mu$ g/ml) for the indicated hours, and western blotting was performed. All western blotting experiments were used  $\alpha$ -tubulin as protein loading control. The numerical values for protein band intensities were corrected with the values for the loading control  $\alpha$ -tubulin bands.
