# Supplementary material for: IL‐8 induces miR‐424‐5p expression and modulates SOCS2/STAT5 signaling pathway in oral squamous cell carcinoma
Source: PubMed Central journal article supplement — Mol Oncol. 2016 Mar 22;10(6):895–909. doi: 10.1016/j.molonc.2016.03.001 (PMC5423170; doi:10.1016/j.molonc.2016.03.001), 2016-03-22
Supplement: MOL2-10-895-s005.pdf [file MOL2-10-895-s005.pdf]

Supplementary Figure 5

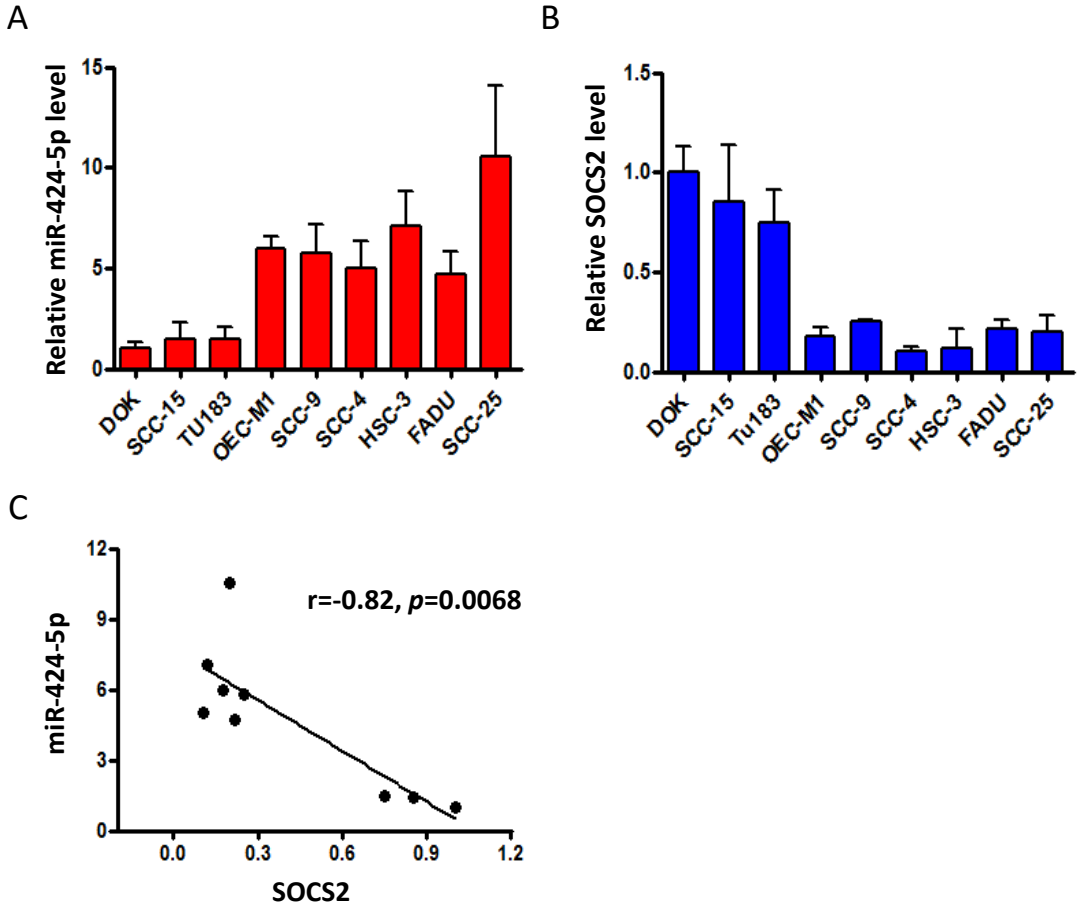

**Supplementary Figure 5 – The correlation between miR-424-5p and SOCS2 in OSCC cell lines.** **A:** qRT-PCR analysis to validate the expression levels of miR-424-5p in OSCC cell lines. The RUN44 small nuclear RNA was used as an internal normalized control. **B:** qRT-PCR analysis to validate the expression levels of SOCS2 in OSCC cell lines. GAPDH was used as an internal control. **C:** The linear correlation between the miR-424-5p and the SOCS2 level.
