# Supplementary material for: IL‐8 induces miR‐424‐5p expression and modulates SOCS2/STAT5 signaling pathway in oral squamous cell carcinoma
Source: PubMed Central journal article supplement — Mol Oncol. 2016 Mar 22;10(6):895–909. doi: 10.1016/j.molonc.2016.03.001 (PMC5423170; doi:10.1016/j.molonc.2016.03.001), 2016-03-22
Supplement: MOL2-10-895-s006.pdf [file MOL2-10-895-s006.pdf]

## Supplementary Figure 6

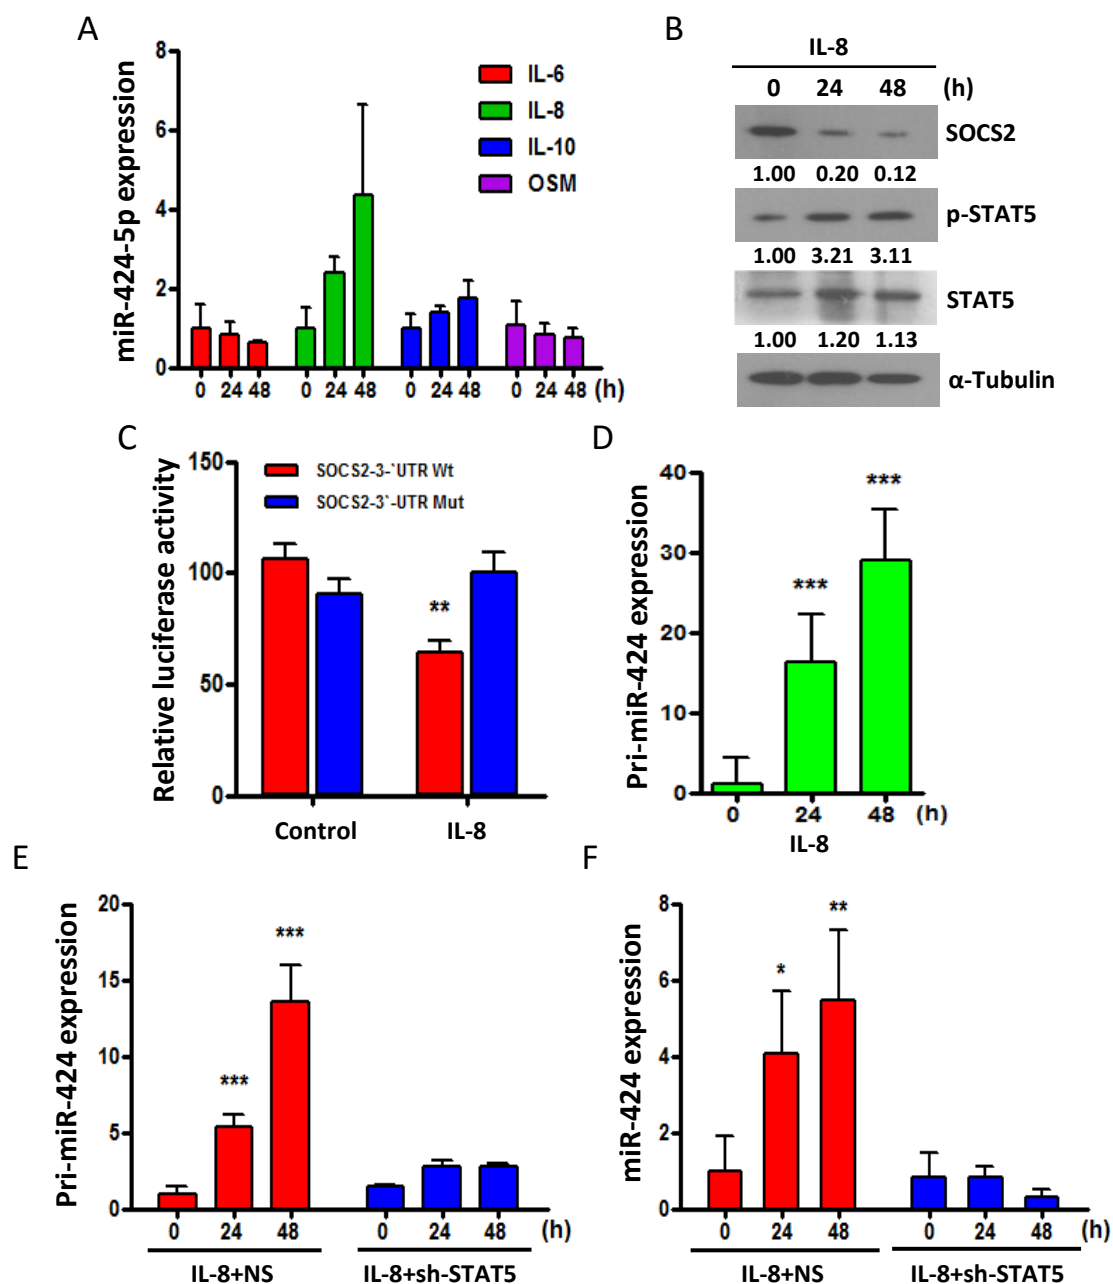

**Supplementary Figure 6 - miR-424-5p disrupts IL-8/STAT5/SOCS2 feedback loop.** **A:** qRT-PCR analysis showing the expression level of miR-424-5p in DOK cells treated with various cytokines, including IL-6, IL-8, IL-10 and OSM (each for 10 ng/ml) for indicated time periods. **B:** Western blot analysis of the SOCS2, STAT5 and phosphor-STAT5 in DOK cells after addition of IL-8 (10 ng/ml) for 24 and 48 h. The numerical values for protein band intensities were corrected with the values for the loading control  $\alpha$ -tubulin bands. **C:** The effect of IL-8 (10 ng/ml) on the luciferase activities of the constructs containing the wild-type or mutant-type SOCS2 3'-UTR in DOK cells. The relative luciferase activity of each sample is measured at 48 h after transfection and normalized to Renilla luciferase activity. **D:** qRT-PCR analysis of primary miR-424 (pri-miR-424) expression in DOK cells treated with IL-8 (10 ng/ml). **E-F:** qRT-PCR analysis of primary miR-424 (pri-miR-424) (**E**) and mature miR-424 (miR-424-5p) (**F**) in DOK5 cells transfected with control (NS) or STAT5 shRNAs for 24 hours and subsequently treated with IL-8 for 24 or 48 h. All data are presented as mean  $\pm$  SE; \*,  $p < 0.05$ ; \*\*,  $p < 0.01$ ; \*\*\*,  $p < 0.001$  and one-way ANOVA  $p = 0.0073$ . (A),  $p = 0.0073$  (C),  $p < 0.0001$  (D),  $p < 0.0001$  (E),  $p = 0.0011$  (F).
